# Supplementary material for: A therapeutic hepatitis B mRNA vaccine with strong immunogenicity and persistent virological suppression
Source: PubMed Central journal article supplement (PMC10838333; doi:10.1038/s41541-024-00813-3), 2024-02-03
Supplement: 41541_2024_813_MOESM2_ESM.pdf [file 41541_2024_813_MOESM2_ESM.pdf]

## Reporting Summary

Nature Portfolio wishes to improve the reproducibility of the work that we publish. This form provides structure for consistency and transparency in reporting. For further information on Nature Portfolio policies, see our [Editorial Policies](#) and the [Editorial Policy Checklist](#).

### Statistics

For all statistical analyses, confirm that the following items are present in the figure legend, table legend, main text, or Methods section.

n/a | Confirmed

- |                                     |                                     |                                                                                                                                                                                                                                                            |
|-------------------------------------|-------------------------------------|------------------------------------------------------------------------------------------------------------------------------------------------------------------------------------------------------------------------------------------------------------|
| <input type="checkbox"/>            | <input checked="" type="checkbox"/> | The exact sample size ( $n$ ) for each experimental group/condition, given as a discrete number and unit of measurement                                                                                                                                    |
| <input type="checkbox"/>            | <input checked="" type="checkbox"/> | A statement on whether measurements were taken from distinct samples or whether the same sample was measured repeatedly                                                                                                                                    |
| <input type="checkbox"/>            | <input checked="" type="checkbox"/> | The statistical test(s) used AND whether they are one- or two-sided<br><i>Only common tests should be described solely by name; describe more complex techniques in the Methods section.</i>                                                               |
| <input type="checkbox"/>            | <input checked="" type="checkbox"/> | A description of all covariates tested                                                                                                                                                                                                                     |
| <input type="checkbox"/>            | <input checked="" type="checkbox"/> | A description of any assumptions or corrections, such as tests of normality and adjustment for multiple comparisons                                                                                                                                        |
| <input type="checkbox"/>            | <input checked="" type="checkbox"/> | A full description of the statistical parameters including central tendency (e.g. means) or other basic estimates (e.g. regression coefficient) AND variation (e.g. standard deviation) or associated estimates of uncertainty (e.g. confidence intervals) |
| <input type="checkbox"/>            | <input checked="" type="checkbox"/> | For null hypothesis testing, the test statistic (e.g. $F$ , $t$ , $r$ ) with confidence intervals, effect sizes, degrees of freedom and $P$ value noted<br><i>Give <math>P</math> values as exact values whenever suitable.</i>                            |
| <input checked="" type="checkbox"/> | <input type="checkbox"/>            | For Bayesian analysis, information on the choice of priors and Markov chain Monte Carlo settings                                                                                                                                                           |
| <input checked="" type="checkbox"/> | <input type="checkbox"/>            | For hierarchical and complex designs, identification of the appropriate level for tests and full reporting of outcomes                                                                                                                                     |
| <input checked="" type="checkbox"/> | <input type="checkbox"/>            | Estimates of effect sizes (e.g. Cohen's $d$ , Pearson's $r$ ), indicating how they were calculated                                                                                                                                                         |

*Our web collection on [statistics for biologists](#) contains articles on many of the points above.*

### Software and code

Policy information about [availability of computer code](#)

Data collection

Data analysis

For manuscripts utilizing custom algorithms or software that are central to the research but not yet described in published literature, software must be made available to editors and reviewers. We strongly encourage code deposition in a community repository (e.g. GitHub). See the Nature Portfolio [guidelines for submitting code & software](#) for further information.

### Data

Policy information about [availability of data](#)

All manuscripts must include a [data availability statement](#). This statement should provide the following information, where applicable:

- Accession codes, unique identifiers, or web links for publicly available datasets
- A description of any restrictions on data availability
- For clinical datasets or third party data, please ensure that the statement adheres to our [policy](#)

## Research involving human participants, their data, or biological material

Policy information about studies with [human participants or human data](#). See also policy information about [sex, gender \(identity/presentation\), and sexual orientation](#) and [race, ethnicity and racism](#).

|                                                                    |                                                                                        |
|--------------------------------------------------------------------|----------------------------------------------------------------------------------------|
| Reporting on sex and gender                                        | <input type="text" value="Our study don't involve human participants or human data."/> |
| Reporting on race, ethnicity, or other socially relevant groupings | <input type="text" value="Our study don't involve human participants or human data."/> |
| Population characteristics                                         | <input type="text" value="Our study don't involve human participants or human data."/> |
| Recruitment                                                        | <input type="text" value="Our study don't involve human participants or human data."/> |
| Ethics oversight                                                   | <input type="text" value="Our study don't involve human participants or human data."/> |

Note that full information on the approval of the study protocol must also be provided in the manuscript.

## Field-specific reporting

Please select the one below that is the best fit for your research. If you are not sure, read the appropriate sections before making your selection.

Life sciences       Behavioural & social sciences       Ecological, evolutionary & environmental sciences

For a reference copy of the document with all sections, see [nature.com/documents/nr-reporting-summary-flat.pdf](https://www.nature.com/documents/nr-reporting-summary-flat.pdf)

## Life sciences study design

All studies must disclose on these points even when the disclosure is negative.

|                 |                                                                                                                                                            |
|-----------------|------------------------------------------------------------------------------------------------------------------------------------------------------------|
| Sample size     | <input type="text" value="We used 5 to 6 animals in each group, and unpaired student's t test or two-way analysis of variance was applied in our study."/> |
| Data exclusions | <input type="text" value="No data were excluded from the analysis."/>                                                                                      |
| Replication     | <input type="text" value="All attempts at replication were successful."/>                                                                                  |
| Randomization   | <input type="text" value="Samples were randomized into experimental groups."/>                                                                             |
| Blinding        | <input type="text" value="None"/>                                                                                                                          |

## Reporting for specific materials, systems and methods

We require information from authors about some types of materials, experimental systems and methods used in many studies. Here, indicate whether each material, system or method listed is relevant to your study. If you are not sure if a list item applies to your research, read the appropriate section before selecting a response.

### Materials & experimental systems

| n/a                                 | Involvement in the study                                        |
|-------------------------------------|-----------------------------------------------------------------|
| <input type="checkbox"/>            | <input checked="" type="checkbox"/> Antibodies                  |
| <input type="checkbox"/>            | <input checked="" type="checkbox"/> Eukaryotic cell lines       |
| <input checked="" type="checkbox"/> | <input type="checkbox"/> Palaeontology and archaeology          |
| <input type="checkbox"/>            | <input checked="" type="checkbox"/> Animals and other organisms |
| <input checked="" type="checkbox"/> | <input type="checkbox"/> Clinical data                          |
| <input checked="" type="checkbox"/> | <input type="checkbox"/> Dual use research of concern           |
| <input checked="" type="checkbox"/> | <input type="checkbox"/> Plants                                 |

### Methods

| n/a                                 | Involvement in the study                           |
|-------------------------------------|----------------------------------------------------|
| <input checked="" type="checkbox"/> | <input type="checkbox"/> ChIP-seq                  |
| <input type="checkbox"/>            | <input checked="" type="checkbox"/> Flow cytometry |
| <input checked="" type="checkbox"/> | <input type="checkbox"/> MRI-based neuroimaging    |

## Antibodies

|                 |                                                                                                                                                                                                                                                                                                                                                                                                                            |
|-----------------|----------------------------------------------------------------------------------------------------------------------------------------------------------------------------------------------------------------------------------------------------------------------------------------------------------------------------------------------------------------------------------------------------------------------------|
| Antibodies used | <input type="text" value="anti-mouse CD45R/B220 (clone: RA3-6B2), CD19 (clone: 6D5), CD38 (clone: RA3-6B2), CD27 (clone: 90), CD3 (clone: LG.3A10), CD4 (clone: 17A2), CD44 (clone: GK1.5), CD62L (clone: IM7), IFN-γ (clone: XMG1.2)? TNF-α (clone: MP6-XT22)? IL-2 (clone: JES6-5H4), PD-1 (clone: 29F.1A12), LAG-3 (clone: C9B7W), TIM-3 (clone: RMT3-23), NK1.1 (clone: PK136), CD103 (clone: 2E7), CD11c (clone: )"/> |
|-----------------|----------------------------------------------------------------------------------------------------------------------------------------------------------------------------------------------------------------------------------------------------------------------------------------------------------------------------------------------------------------------------------------------------------------------------|

N418)?MHCII(clone: M5/114.15.2)? CD80(clone:16-10A1), CD86(clone: IT2.2), Gr-1(clone: RB6-8C5), LY6C(clone: HK1.4), CD11b(clone: M1/70)? F4/80(clone: BM8), CD8 $\alpha$ (clone: 53-6.7).

Validation

Anti-mouse monoclonal used for FACS analysis were from biolegend, BD and ebioscience according to the manufacturers' instructions.

## Eukaryotic cell lines

Policy information about [cell lines and Sex and Gender in Research](#)

Cell line source(s)

HEK 293T and AML12 cells were purchased from ATCC.

Authentication

All cell lines were tested for mycoplasma contamination.

Mycoplasma contamination

All cell lines were tested negative for mycoplasma contamination.

Commonly misidentified lines  
(See [ICLAC](#) register)

None

## Animals and other research organisms

Policy information about [studies involving animals; ARRIVE guidelines](#) recommended for reporting animal research, and [Sex and Gender in Research](#)

Laboratory animals

C57BL/6J mice (5-6weeks old) was purchased from Beijing HFK Bioscience Co.Ltd.

Wild animals

C57BL/6J mice (5-6weeks old) was purchased from Beijing HFK Bioscience Co.Ltd.

Reporting on sex

We only used male mice to generate the HBV-carrier mice model.

Field-collected samples

The study didn't involve samples collected from the field.

Ethics oversight

The Institutional Animal Care and Use Committee of Shandong University

Note that full information on the approval of the study protocol must also be provided in the manuscript.

## Plants

Seed stocks

Our study didn't involve plants data.

Novel plant genotypes

Our study didn't involve plants data.

Authentication

Our study didn't involve plants data.

## Flow Cytometry

### Plots

Confirm that:

- The axis labels state the marker and fluorochrome used (e.g. CD4-FITC).
- The axis scales are clearly visible. Include numbers along axes only for bottom left plot of group (a 'group' is an analysis of identical markers).
- All plots are contour plots with outliers or pseudocolor plots.
- A numerical value for number of cells or percentage (with statistics) is provided.

### Methodology

Sample preparation

Hepatic and splenic mononuclear cell from C57BL/6J mice were isolated by centrifugation, and detailed procedures are available in the Methods section.

Instrument

Data were collected using a BD FACSymphony A3.

Software

Cell population abundance

Gating strategy

Tick this box to confirm that a figure exemplifying the gating strategy is provided in the Supplementary Information.
